# Supplementary material
Source: PubMed Central journal article supplement (PMC8802325)
Supplement: NIHMS1733800-supplement-2.pdf [file NIHMS1733800-supplement-2.pdf]

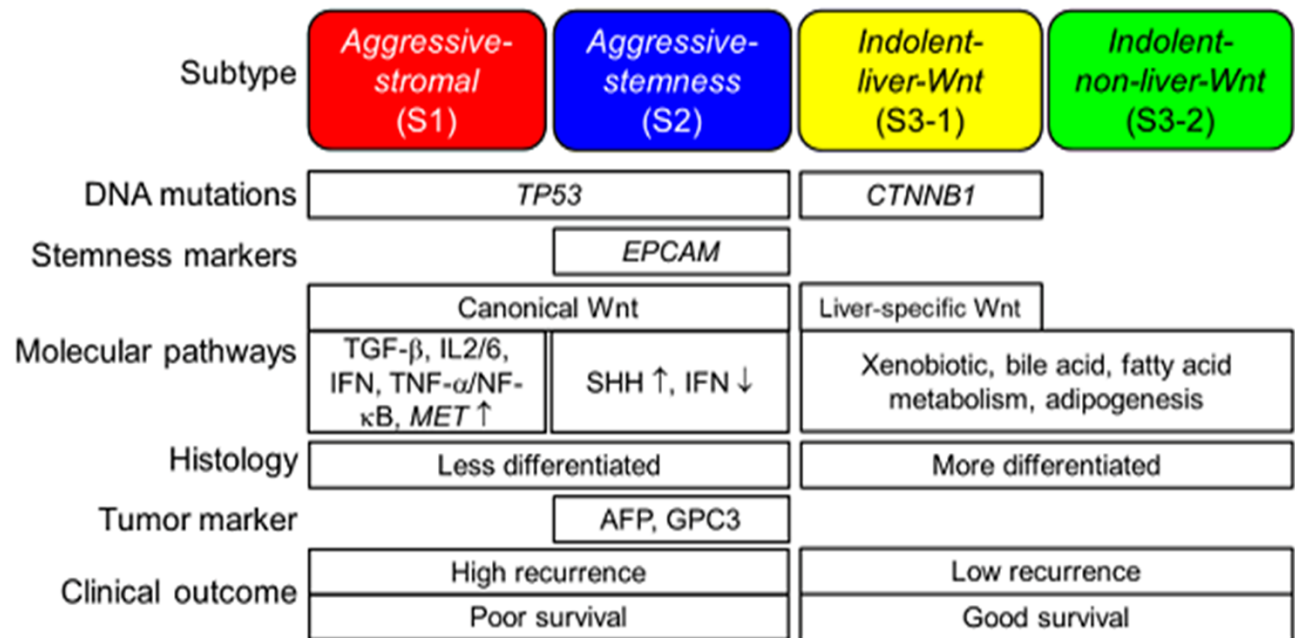

**Figure S2:** An overview of how HCC samples are classified into one of three subtypes based upon a variety of histological, clinical, and genetic data. Genetic data is generated through RNA-seq of the HCC samples.
