# Supplementary material
Source: PubMed Central journal article supplement (PMC8802325)
Supplement: NIHMS1733800-supplement-3.pdf [file NIHMS1733800-supplement-3.pdf]

**Table S1:** Patient characteristics of all tissues between the discovery and validation cohorts.

Abbreviations: HCV, hepatitis C virus; HBV, hepatitis B virus; ALD, alcohol-related liver disease; NASH, non-alcoholic steatohepatitis; AFP, alpha-fetoprotein; AJCC, American Joint Committee of Cancer.

| Variables                                                                                 | Discovery Cohort (n = 25)         | Validation Cohort (n = 12)      |
|-------------------------------------------------------------------------------------------|-----------------------------------|---------------------------------|
| Age                                                                                       | 68 (59-72)                        | 58 (49-68)                      |
| Male sex                                                                                  | 18/7 (72%/28%)                    | 7/5 (58%/42%)                   |
| Etiology<br>(HCV/HBV/ALD/NASH/Others)                                                     | 7/11/3/2/2<br>(28%/44%/12%/8%/8%) | 4/6/1/0/1<br>(33%/50%/8%/0%/8%) |
| AFP, ng/mL                                                                                | 52 (7-830)                        | 6 (4-155)                       |
| Child-Pugh class (A/B/C)                                                                  | 21/2/1 (88%/8%/4%)                | 11/1/0 (92%/8%/0%)              |
| AJCC T stage (T1/T2/T3/T4)                                                                | 8/12/2/1<br>(35%/52%/9%/4%)       | 4/6/2/0<br>(33%/50%/17%/0%)     |
| Hoshida HCC subtype<br>(S1/S2/S3.1/S3.2)                                                  | 6/4/4/11<br>(24%/16%/16%/44%)     | 5/2/1/4<br>(42%/17%/8%/33%)     |
| Categorical variables are shown as n (%). Continuous variables are shown as median (IQR). |                                   |                                 |
