# Supplementary material
Source: PubMed Central journal article supplement (PMC8802325)
Supplement: NIHMS1733800-supplement-4.pdf [file NIHMS1733800-supplement-4.pdf]

**Table S2:** Full list of glycans analyzed on the FT-ICR mass spectrometer.

| Observed m/z | Theoretical m/z | Error in PPM | Glycan Structure             |
|--------------|-----------------|--------------|------------------------------|
| 771.2694     | 771.2822        | 16.6346      | Hex2HexNAc2                  |
| 933.317      | 933.3170        | 0.0000       | Hex3HexNAc2                  |
| 1079.3753    | 1079.3749       | 0.3706       | Hex3dHex1HexNAc2             |
| 1095.3690    | 1095.3698       | 0.7303       | Hex4HexNAc2                  |
| 1136.3952    | 1136.3964       | 1.0560       | Hex3HexNAc3                  |
| 1257.4225    | 1257.4226       | 0.0795       | Hex5HexNAc2                  |
| 1282.4522    | 1282.4543       | 1.6375       | Hex3dHex1HexNAc3             |
| 1298.4487    | 1298.4492       | 0.3851       | Hex4HexNAc3                  |
| 1339.4736    | 1339.4758       | 1.6424       | Hex3HexNAc4                  |
| 1419.4753    | 1419.4754       | 0.0704       | Hex6HexNAc2                  |
| 1444.5071    | 1444.5071       | 0.0000       | Hex4dHex1HexNAc3             |
| 1460.5029    | 1460.502        | 0.6162       | Hex5HexNAc3                  |
| 1485.5326    | 1485.5337       | 0.7405       | Hex3dHex1HexNAc4             |
| 1501.5309    | 1501.5286       | 1.5318       | Hex4HexNAc4                  |
| 1542.5564    | 1542.5551       | 0.8428       | Hex3HexNAc5                  |
| 1581.5279    | 1581.5282       | 7.4882       | Hex7HexNAc2                  |
| 1606.5714    | 1606.5599       | 0.1897       | Hex5dHex1HexNAc3             |
| 1611.6212    | 1611.5266       | 7.1582       | Hex4HexNAc3NeuAc1+ 2Na       |
| 1622.5582    | 1622.5548       | 4.4055       | Hex6HexNAc3                  |
| 1647.5873    | 1647.5865       | 2.0955       | Hex4dHex1HexNAc4             |
| 1663.5835    | 1663.5814       | 0.4856       | Hex5HexNAc4                  |
| 1688.6124    | 1688.613        | 0.3553       | Hex3dHex1HexNAc5             |
| 1704.6180    | 1704.6079       | 5.9251       | Hex4HexNAc5                  |
| 1743.5816    | 1743.581        | 0.3441       | Hex8HexNAc2                  |
| 1809.6404    | 1809.6393       | 0.6079       | Hex5dHex1HexNAc4             |
| 1825.6276    | 1825.6342       | 3.6152       | Hex6HexNAc4                  |
| 1850.6643    | 1850.6659       | 0.8646       | Hex4dHex1HexNAc5             |
| 1866.6591    | 1866.6608       | 0.9107       | Hex5HexNAc5                  |
| 1905.6347    | 1905.6338       | 0.4723       | Hex9HexNAc2                  |
| 1911.5935    | 1911.5859       | 3.9758       | Hex5dHex1HexNAc4 + 2Na + SO4 |
| 1954.6746    | 1954.6768       | 1.1255       | Hex5HexNAc4NeuAc1            |
| 1955.6802    | 1955.6972       | 8.6926       | Hex5dHex2HexNAc4             |
| 1976.6593    | 1976.6666       | 3.6931       | Hex5HexNAc4NeuAc1 + 2Na      |
| 1992.6459    | 1992.6537       | 3.9144       | Hex5HexNAc4NeuGc1 + 2Na      |
| 2010.6535    | 2010.6224       | 15.4678      | Hex7dHex1HexNAc3 + SO4       |
| 2012.7208    | 2012.7187       | 1.0434       | Hex5dHex1HexNAc5             |
| 2028.7122    | 2028.7136       | 0.6901       | Hex6HexNAc5                  |
| 2057.6575    | 2057.6439       | 6.6095       | Hex5dHex2HexNAc4 + 2Na + SO4 |
| 2067.6925    | 2067.6837       | 4.2560       | Hex10HexNAc2                 |
| 2069.7194    | 2069.7402       | 10.0491      | Hex5HexNAc6                  |
| 2100.7356    | 2100.7347       | 0.4284       | Hex5dHex1HexNAc4NeuAc1       |
| 2101.7371    | 2101.7551       | 8.5643       | Hex5dHex3HexNAc4             |
| 2122.7149    | 2116.7296       | 4.5225       | Hex5dHex1HexNAc4NeuAc1 + 2Na |
| 2157.7729    | 2157.7562       | 7.7400       | Hex5HexNAc5NeuAc1            |

|           |           |         |                               |
|-----------|-----------|---------|-------------------------------|
| 2158.7790 | 2158.7766 | 1.1117  | Hex5dHex2HexNAc5              |
| 2163.7230 | 2163.7432 | 3.6511  | Hex4dHex1HexNAc5NeuAc1 + 2Na  |
| 2174.7784 | 2174.7715 | 3.1727  | Hex6dHex1HexNAc5              |
| 2179.7457 | 2179.7460 | 0.1230  | Hex5HexNAc5NeuAc1 + 2Na       |
| 2215.7670 | 2215.798  | 16.8793 | Hex5dHex1HexNAc6              |
| 2245.7753 | 2245.7722 | 1.3804  | Hex5HexNAc4NeuAc2             |
| 2246.7814 | 2246.7926 | 4.9844  | Hex5dHex2HexNAc4NeuAc1        |
| 2267.7479 | 2267.7620 | 6.2176  | Hex5HexNAc4NeuAc2 + 2Na       |
| 2268.7737 | 2268.7824 | 3.8206  | Hex5dHex2HexNAc4NeuAc1 + 2Na  |
| 2276.7054 | 2276.7180 | 5.5343  | Hex6dHex1HexNAc5 + 1SO4 + 2Na |
| 2289.7335 | 2289.7326 | 0.3931  | Hex5HexNAc4NeuAc2 + 3Na       |
| 2303.8154 | 2303.8141 | 0.5643  | Hex5dHex1HexNAc5NeuAc1        |
| 2304.8300 | 2304.8345 | 1.9524  | Hex5dHex3HexNAc5              |
| 2319.8138 | 2319.8090 | 2.0691  | Hex6HexNAc5NeuAc1             |
| 2320.8276 | 2320.8294 | 0.7756  | Hex6dHex2HexNAc5              |
| 2325.7902 | 2333.6647 | 5.8904  | Hex5dHex1HexNAc5NeuAc1 + 2Na  |
| 2333.6991 | 2333.6647 | 14.7408 | Hex5HexNAc5NeuGc1 + 2SO4      |
| 2341.7926 | 2341.7988 | 2.6475  | Hex6HexNAc5NeuAc1 + 2Na       |
| 2377.8445 | 2377.8509 | 2.6915  | Hex6dHex1HexNAc6              |
| 2391.8300 | 2391.8301 | 0.0418  | Hex5dHex1HexNAc4NeuAc2        |
| 2393.8436 | 2393.8458 | 0.9190  | Hex7HexNAc6                   |
| 2413.8292 | 2413.8199 | 3.8528  | Hex5dHex1HexNAc4NeuAc2 + 2Na  |
| 2421.8446 | 2421.7984 | 19.0767 | Hex9HexNAc3NeuAc1 + 2Na       |
| 2435.8095 | 2465.8669 | 0.0821  | Hex5dHex1HexNAc4NeuAc2 + 3Na  |
| 2465.8649 | 2465.8669 | 0.8111  | Hex6dHex1HexNAc5NeuAc1        |
| 2487.8475 | 2487.8567 | 3.6980  | Hex6dHex1HexNAc5NeuAc1 + 2Na  |
| 2539.9045 | 2539.9037 | 0.3150  | Hex7dHex1HexNAc6              |
| 2632.9040 | 2632.8942 | 3.7343  | Hex6HexNAc5NeuAc2 + 2Na       |
| 2633.9218 | 2633.9146 | 2.7336  | Hex6dHex2HexNAc5NeuAc1 + 2Na  |
| 2653.9568 | 2653.9718 | 5.6519  | Hex5dHex4HexNAc6              |
| 2684.9366 | 2684.9412 | 1.7133  | Hex7HexNAc6NeuAc1             |
| 2685.9551 | 2685.9616 | 2.4200  | Hex7dHex2HexNAc6              |
| 2706.9144 | 2706.9310 | 6.1324  | Hex7HexNAc6NeuAc1 + 2Na       |
| 2742.9912 | 2742.9831 | 2.9530  | Hex7dHex1HexNAc7              |
| 2758.9686 | 2758.978  | 3.4071  | Hex8HexNAc7                   |
| 2779.9528 | 2779.9725 | 7.0864  | Hex6dHex3HexNAc5NeuAc1 + 2Na  |
| 2830.9227 | 2830.9991 | 26.9869 | Hex7dHex1HexNAc6NeuAc1        |
| 2832.0145 | 2832.0195 | 1.7655  | Hex7dHex3HexNAc6              |
| 2853.0016 | 2852.9889 | 4.4515  | Hex7dHex1HexNAc6NeuAc1 + 2Na  |
| 2905.0552 | 2905.0359 | 6.6436  | Hex8dHex1HexNAc7              |
| 3124.1081 | 3124.1102 | 0.6722  | Hex9HexNAc8                   |
| 3218.1263 | 3218.1211 | 1.6258  | Hex8dHex1HexNAc7NeuAc1 + 2Na  |
| 3270.1746 | 3270.1681 | 1.9877  | Hex9dHex1HexNAc8              |
| 3635.3285 | 3635.3003 | 7.7573  | Hex10dHex1HexNAc9             |
