# Supplementary material
Source: PubMed Central journal article supplement (PMC8802325)
Supplement: NIHMS1733800-supplement-5.pdf [file NIHMS1733800-supplement-5.pdf]

**Table S3:** Full list of glycans analyzed on the MALDI-TOF mass spectrometer

| Observed m/z | Theoretical m/z | Error in PPM | Glycan Structure             |
|--------------|-----------------|--------------|------------------------------|
| 933.318      | 933.317         | 1.0714       | Hex3HexNAc2                  |
| 1079.371     | 1079.375        | 3.7058       | Hex3dHex1HexNAc2             |
| 1095.370     | 1095.370        | 0.0000       | Hex4HexNAc2                  |
| 1136.395     | 1136.396        | 0.8800       | Hex3HexNAc3                  |
| 1257.423     | 1257.423        | 0.0000       | Hex5HexNAc2                  |
| 1282.446     | 1282.454        | 6.2380       | Hex3dHex1HexNAc3             |
| 1298.446     | 1298.449        | 2.3104       | Hex4HexNAc3                  |
| 1339.473     | 1339.476        | 2.2397       | Hex3HexNAc4                  |
| 1419.475     | 1419.475        | 0.0000       | Hex6HexNAc2                  |
| 1444.495     | 1444.507        | 8.3073       | Hex4dHex1HexNAc3             |
| 1460.513     | 1460.502        | 7.5317       | Hex5HexNAc3                  |
| 1485.531     | 1485.534        | 2.0195       | Hex3dHex1HexNAc4             |
| 1501.528     | 1501.529        | 0.6660       | Hex4HexNAc4                  |
| 1542.547     | 1542.555        | 5.1862       | Hex3HexNAc5                  |
| 1581.526     | 1581.528        | 1.2646       | Hex7HexNAc2                  |
| 1606.585     | 1606.560        | 15.5612      | Hex5dHex1HexNAc3             |
| 1622.543     | 1622.555        | 7.3957       | Hex6HexNAc3                  |
| 1647.596     | 1647.587        | 5.4625       | Hex4dHex1HexNAc4             |
| 1663.582     | 1663.581        | 0.6011       | Hex5HexNAc4                  |
| 1688.603     | 1688.613        | 5.9220       | Hex3dHex1HexNAc5             |
| 1704.597     | 1704.608        | 6.4531       | Hex4HexNAc5                  |
| 1743.582     | 1743.581        | 0.5735       | Hex8HexNAc2                  |
| 1792.627     | 1792.624        | 1.6735       | Hex4HexNAc4NeuAc1            |
| 1809.641     | 1809.639        | 1.1052       | Hex5dHex1HexNAc4             |
| 1825.626     | 1825.634        | 4.3820       | Hex6HexNAc4                  |
| 1850.660     | 1850.666        | 3.2421       | Hex4dHex1HexNAc5             |
| 1866.669     | 1866.661        | 4.2857       | Hex5HexNAc5                  |
| 1905.636     | 1905.634        | 1.0495       | Hex9HexNAc2                  |
| 1911.567     | 1911.586        | 9.9394       | Hex5dHex1HexNAc4 + 2Na + SO4 |
| 1955.699     | 1955.697        | 1.0227       | Hex5dHex2HexNAc4             |
| 1976.671     | 1976.667        | 2.0236       | Hex5HexNAc4NeuAc1 + 2Na      |
| 2010.670     | 2010.622        | 23.8732      | Hex7dHex1HexNAc3 + SO4       |
| 2012.719     | 2012.719        | 0.0000       | Hex5dHex1HexNAc5             |
| 2028.712     | 2028.714        | 0.9858       | Hex6HexNAc5                  |
| 2057.702     | 2057.644        | 28.1876      | Hex5dHex2HexNAc4 + 2Na + SO4 |
| 2067.680     | 2067.684        | 1.9345       | Hex10HexNAc2                 |
| 2122.738     | 2122.725        | 6.1242       | Hex5dHex1HexNAc4NeuAc1 + 2Na |
| 2174.767     | 2174.772        | 2.2991       | Hex6dHex1HexNAc5             |
| 2215.794     | 2215.730        | 28.8844      | Hex5dHex1HexNAc6             |
| 2320.835     | 2320.829        | 2.5853       | Hex6dHex2HexNAc5             |
| 2341.809     | 2341.799        | 4.2702       | Hex6HexNAc5NeuAc1 + 2Na      |
| 2377.842     | 2377.851        | 3.7849       | Hex6dHex1HexNAc6             |
| 2393.849     | 2393.846        | 1.2532       | Hex7HexNAc6                  |
| 2421.770     | 2421.798        | 11.5617      | Hex9HexNAc3NeuAc1 + 2Na      |

|          |          |         |                              |
|----------|----------|---------|------------------------------|
| 2487.867 | 2487.857 | 4.0195  | Hex6dHex1HexNAc5NeuAc1 + 2Na |
| 2539.902 | 2539.904 | 0.7874  | Hex7dHex1HexNAc6             |
| 2685.955 | 2685.962 | 2.6061  | Hex7dHex2HexNAc6             |
| 2743.062 | 2742.983 | 28.8008 | Hex7dHex1HexNAc7             |
| 2759.059 | 2758.978 | 29.3587 | Hex8HexNAc7                  |
| 2905.054 | 2905.036 | 6.1961  | Hex8dHex1HexNAc7             |
| 3124.155 | 3124.110 | 14.4041 | Hex9HexNAc8                  |
