# Supplementary material
Source: PubMed Central journal article supplement (PMC8802325)

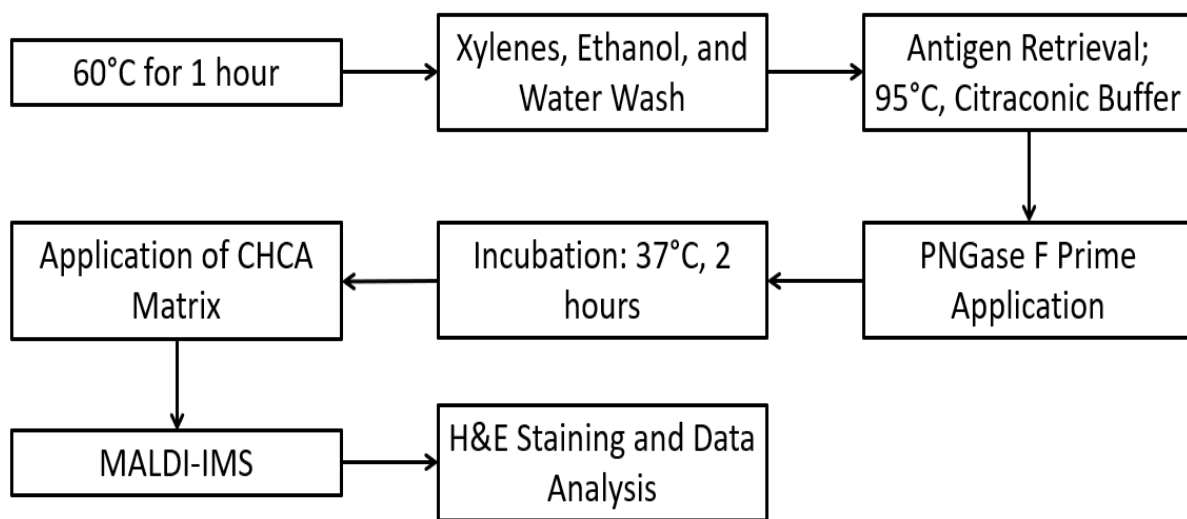

**Figure S1:** The full workflow to prepare FFPE tissues for MALDI-IMS analysis.

Supplement: NIHMS1733800-supplement-1.pdf [file NIHMS1733800-supplement-1.pdf]
